# Supplementary material for: Breakthrough infections with the omicron and delta variants of SARS-CoV-2 result in similar re-activation of vaccine-induced immunity
Source: PubMed Central journal article supplement (PMC9493489; doi:10.3389/fimmu.2022.964525), 2022-09-08
Supplement: DataSheet_1.pdf [file DataSheet_1.pdf]

## SUPPLEMENTAL MATERIAL:

**Supplemental Table 1:** The Excel file contains worksheets with source data for Figs 2-4 in context of vaccine status, type of infection and age. Separate sheets contain raw data for biochemical analysis and markers of inflammation and results from *in vitro* neutralization assays for SARS-CoV-2.

**Supplemental Table 2.** Clinical biochemistry at admission (T1) and 1-week follow-up (T2) in COVID-19 patients

|                                      |    | Omicron, n=52      |                   | Delta, n=18        |                   | Ref. limits                   |
|--------------------------------------|----|--------------------|-------------------|--------------------|-------------------|-------------------------------|
|                                      |    | Median (25th,75th) | Outside ref limit | Median (25th,75th) | Outside ref limit |                               |
| Hemoglobin, g/dL                     | T1 | 14.5 (13.5, 15.1)  | 2.0 %             | 14.0 (13.1, 14.5)  | 5.6 %             | W: 11.7-15.3;<br>M: 13.4-17.0 |
|                                      | T2 | 13.5 (12.7, 14.3)  | 14.6 %            | 13.6 (13.3, 13.8)  | 14.3 %            |                               |
| Platelet counts, x10 <sup>9</sup> /L | T1 | 240 (205, 280)     | 4.0 %             | 234 (201, 307)     | 5.6 %             | 145-390                       |
|                                      | T2 | 277 (236, 323)     | 5.0 %             | 297 (215, 324)     | 7.1 %             |                               |
| WBC, x10 <sup>9</sup> /L             | T1 | 5.2 (4.3, 5.9)     | 2.0 %             | 5.3 (4.5, 7.0)     | 0.0 %             | 3.5-10                        |
|                                      | T2 | 5.7 (4.9, 6.6)     | 4.9 %             | 6.1 (5.4, 6.7)     | 0.0 %             |                               |
| Neutrophils, x10 <sup>9</sup> /L     | T1 | 2.6 (2.1, 3.2)     | 2.0 %             | 2.8 (2.3, 3.8)     | 5.6 %             | 1.5-7.3                       |
|                                      | T2 | 3.3 (2.6, 4.0)     | 2.4 %             | 3.7 (3.0, 4.2)     | 0.0 %             |                               |
| Lymphocytes, x10 <sup>9</sup> /L     | T1 | 1.9 (1.6, 2.4)     | 5.9 %             | 1.9 (1.5, 2.4)     | 5.6 %             | 1.1-3-3                       |
|                                      | T2 | 1.8 (1.5, 2.1)     | 4.9 %             | 1.8 (1.5, 1.9)     | 0.0 %             |                               |
| Monocytes, x10 <sup>9</sup> /L       | T1 | 0.4 (0.3, 0.5)     | 2.0 %             | 0.5 (0.4, 0.5)     | 5.6 %             | 0.2-0.8                       |
|                                      | T2 | 0.4 (0.4, 0.5)     | 0.0 %             | 0.5 (0.4, 0.6)     | 0.0 %             |                               |
| AST, U/L                             | T1 | 23 (20, 28)        | 5.8 %             | 26 (20, 29)        | 5.6 %             | W: 15-35;<br>M: 15-45         |
|                                      | T2 | 23 (19, 29)        | 7.1 %             | 20 (17, 25)        | 0.0 %             |                               |
| ALT, U/L                             | T1 | 24 (18, 38)        | 0.0 %             | 23 (18, 31)        | 0.0 %             | W: 10-45;<br>M: 10-70         |
|                                      | T2 | 25 (17, 38)        | 4.8 %             | 19 (16, 23)        | 7.1 %             |                               |
| Creatinine, µmol/L                   | T1 | 63 (59, 73)        | 0.0 %             | 66 (58, 76)        | 0.0 %             | W: 45-90;<br>M: 60-105        |
|                                      | T2 | 65 (61, 75)        | 0.0 %             | 69 (60, 79)        | 0.0 %             |                               |
| eGFR, mL/min/1.73m <sup>2</sup>      | T1 | 113 (103, 119)     | 0.0 %             | 108 (100, 114)     | 0.0 %             | >60                           |
|                                      | T2 | 113 (102, 118)     | 0.0 %             | 104 (89, 111)      | 0.0 %             |                               |
| Ferritin, µg/L                       | T1 | 119 (66, 221)      | 7.7 %             | 159 (72, 201)      | 5.6 %             | W: 10-170;<br>M: 30-400       |
|                                      | T2 | 103 (65, 191)      | 4.8 %             | 93 (48, 235)       | 21.4 %            |                               |
| Fibrinogen, g/L                      | T1 | 3.3 (3.1, 4.1)     | 26.8 %            | 3.6 (3.2, 4.1)     | 27.8 %            | 1.9-4.0                       |
|                                      | T2 | 2.7 (2.4, 3.2)     | 4.8 %             | 2.9 (2.2, 3.5)     | 0.0 %             |                               |
| LD, U/L                              | T1 | 172 (160, 186)     | 9.6 %             | 169 (158, 178)     | 0.0 %             | 105-205                       |
|                                      | T2 | 172 (158, 192)     | 11.9 %            | 161 (146, 178)     | 0.0 %             |                               |
| ALP, U/L                             | T1 | 66 (51, 80)        | 1.9 %             | 64 (55, 79)        | 5.6 %             | 35-105                        |
|                                      | T2 | 60 (50, 75)        | 2.4 %             | 63 (49, 69)        | 0.0 %             |                               |
| CRP, mg/L                            | T1 | 1.8 (0.7, 4.9)     | 28.8 %            | 1.9 (1.0, 4.4)     | 27.8 %            | <4                            |
|                                      | T2 | 0.5 (0.5, 0.9)     | 4.8 %             | 0.6 (0.5, 1.1)     | 14.3 %            |                               |
| Creatin kinase, U/L                  | T1 | 76 (60, 102)       | 1.9 %             | 72 (51, 104)       | 0.0 %             | W: 35-210;                    |

|                   |    |                   |        |                   |        |                                |
|-------------------|----|-------------------|--------|-------------------|--------|--------------------------------|
|                   | T2 | 85 (67, 111)      | 2.4 %  | 70 (59, 93)       | 0.0 %  | M: 50-400                      |
| D-dimer, mg/L FEU | T1 | 0.23 (0.18, 0.32) | 7.3 %  | 0.23 (0.19, 0.31) | 5.6 %  | <50 yr: <0.50; >50 yr          |
|                   | T2 | 0.19 (0.18, 0.32) | 11.9 % | 0.22 (0.18, 0.42) | 14.3 % | <age/100                       |
| Troponin T, ng/L  | T1 | 4 (4, 4)          | 1.9 %  | 4 (4, 4)          | 11.1 % | <14                            |
|                   | T2 | 4 (4, 5)          | 0.0 %  | 4 (4, 4)          | 7.1 %  |                                |
| NT-proBNP         | T1 | 49 (49, 49)       | 0.0 %  | 49 (49, 63)       | 0.0 %  | W <50 yr: <170;<br>>50 yr <300 |
|                   | T2 | 49 (49, 62)       | 0.0 %  | 56 (49, 80)       | 0.0 %  | M <50 yr: <85;<br>>50 yr <250  |
| IgG, g/L          | T1 | 11.0 (10.0, 12.3) | 3.8 %  | 10.8 (9.7, 12.4)  | 11.1 % | W: 6.9-15.7;                   |
|                   | T2 | 10.6 (9.3, 11.5)  | 0.0 %  | 11.0 (9.3, 12.1)  | 7.1 %  | M: 6.1-14-9                    |
| IgA, g/L          | T1 | 1.9 (1.65, 2.45)  | 7.7 %  | 2.8 (2.0, 3.1)*   | 16.7 % | 0.7-3.7                        |
|                   | T2 | 1.8 (1.5, 2.2)    | 2.4 %  | 2.4 (1.9, 2.9)*   | 7.1 %  |                                |
| IgM, g/L          | T1 | 1.2 (0.89, 1.6)   | 7.7 %  | 1.35 (0.82, 1.7)  | 0.0 %  | 0.4-2.1                        |
|                   | T2 | 1.1 (0.83, 1.6)   | 2.4 %  | 1.05 (0.76, 1.6)  | 0.0 %  |                                |

\*p<0.05 vs. omicron. WBC, white blood count; AST, aspartate aminotransferase; ALT, alanine aminotransferase; eGFR, estimated glomerular filtration rate; LD, lactate dehydrogenase; ALP, alkaline phosphatase; CRP, C-reactive protein; NT-proBNP, N-terminal pro-brain natriuretic peptide; Ig, immunoglobulin.

### Supplemental Table 3: Markers of immune activation and inflammation in COVID-19

patients and healthy controls (HC) at admission (T1) and follow-up (T2).

|                 |    | HC, n=13          | Omicron, n=52              | Delta, n=18         | p-value |
|-----------------|----|-------------------|----------------------------|---------------------|---------|
| sCD14<br>µg/mL  | T1 |                   | 1.08 (0.95,1.21)***        | 1.09 (0.95,1.32)*** | <0.001  |
|                 | T2 | 0.71 (0.44,0.82)  | 0.73 (0.6,0.84)            | 0.63 (0.59,0.74)    | 0.12    |
| sCD163<br>ng/mL | T1 |                   | 540 (446,645)***           | 555 (489,726)***    | <0.001  |
|                 | T2 | 325 (301,422)     | 390 (327,510) <sup>†</sup> | 340 (268,369)       | 0.035   |
| MPO<br>Ng/mL    | T1 |                   | 13.3 (7.3,17.16)           | 14.02 (10.51,17.91) | 0.054   |
|                 | T2 | 7.34 (5.76,11.07) | 8.27 (6,10.88)             | 8.71 (5.3,14.12)    | 0.93    |
| sCD25<br>pg/mL  | T1 |                   | 623 (508,875)              | 537 (430,708)       | 0.16    |
|                 | T2 | 563 (459,603)     | 552 (411,730)              | 651 (456,705)       | 0.71    |
| sTIM3<br>ng/mL  | T1 |                   | 6.03 (5.11,7.13)           | 6.12 (5.24,6.87)    | 0.46    |
|                 | T2 | 5.17 (4.56,6.88)  | 5.21 (4.79,6.53)           | 5.57 (4.71,6.88)    | 0.89    |
| LBP<br>µg/mL    | T1 |                   | 8.88 (7.36,11.23)**        | 8.9 (7.15,10.59)**  | 0.010   |
|                 | T2 | 6.48 (5.52,8.16)  | 7.48 (5.96,8.84)           | 8.73 (6.88,10.4)    | 0.072   |
| TCC<br>AU/mL    | T1 |                   | 0.94 (0.72,1.17)           | 0.91 (0.81,1.53)    | 0.76    |
|                 | T2 | 0.87 (0.77,1.2)   | 0.87 (0.67,1.09)           | 0.94 (0.82,1.03)    | 0.45    |
| IP10<br>Pg/mL   | T1 |                   | 113 (76,281)**             | 97 (71,162)*        | 0.030   |
|                 | T2 | 80 (51,92)        | 72 (45,93)                 | 69 (50,102)         | 0.89    |
| vWF<br>AU       | T1 |                   | 72.1 (58.9,88.9)**         | 79.7 (63.7,93.8)*   | 0.009   |
|                 | T2 | 90.7 (87.9,97.2)  | 100.7 (86.3,112.9)         | 102.5 (92.2,108.8)  | 0.29    |
| PTX3<br>Ng/mL   | T1 |                   | 2.29 (1.63,4.3)**          | 1.9 (1.52,3.51)*    | 0.009   |
|                 | T2 | 1.26 (1,1.92)     | 1.76 (1.22,2.27)           | 2.39 (1.86,2.86)**  | 0.016   |
| GDF15<br>Pg/mL  | T1 |                   | 322 (248,442)***           | 272 (244,365)*      | 0.001   |
|                 | T2 | 201 (186,252)     | 304 (216,416)**            | 300 (228,377)*      | 0.010   |

|         |    |                  |                  |                  |      |
|---------|----|------------------|------------------|------------------|------|
| YKL40   | T1 |                  | 35.1 (28.7,40.4) | 32.4 (30.2,43.7) | 0.82 |
| Ng/mL   | T2 | 31.2 (28.3,40.9) | 37.7 (31.5,47.1) | 35.6 (28.5,53.5) | 0.27 |
| MMP9    | T1 |                  | 25 (20.4,32.8)   | 27.9 (20.8,43.7) | 0.83 |
| Ng/mL   | T2 | 28.1 (18.4,46)   | 27.5 (21.6,36.9) | 26.6 (17.4,41.8) | 0.97 |
| S100A12 | T1 |                  | 2.45 (1.69,3.85) | 2.16 (1.42,3.92) | 0.24 |
| Ng/mL   | T2 | 1.94 (1.34,2.33) | 2.16 (1.84,2.93) | 1.99 (1.45,3.43) | 0.24 |

P-value in right column is from the a priori Kruskal-Wallis analysis. \* $p < 0.05$ , \*\* $p < 0.01$ , \*\*\* $p < 0.001$  vs. HC. s, soluble; MPO, myeloperoxidase; TIM3, T cell immunoglobulin and mucin-domain containing-3; LBP, lipopolysaccharide binding protein; TCC, terminal complement complex; IP10, Interferon gamma-induced protein 10; vWF, von Willebrand factor; PTX3, Pentraxin 3; GDF15, Growth Differentiation Factor 15; YKL-40, Chitinase 3-like 1; MMP9, Matrix metalloproteinase 9; S100A12, S100 calcium-binding protein A12.
